# Supplementary material
Source: PubMed Central journal article supplement (PMC6904417)
Supplement: nxz058_supplemental_file.pdf [file nxz058_supplemental_file.pdf]

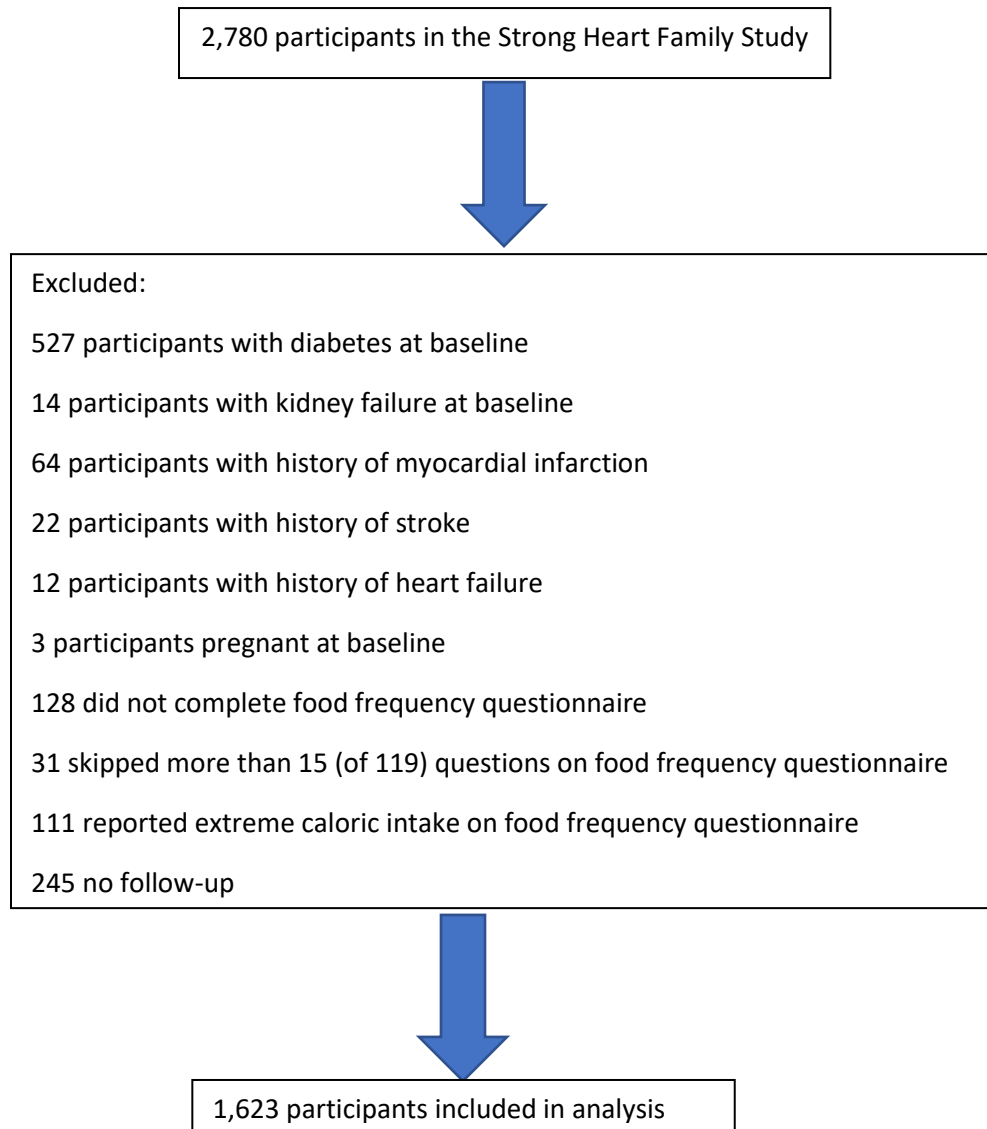

**Supplemental Figure 1.** Study Participant Flow Chart

**Supplemental Table 1. Hazard Ratios (95% CIs) for associations of full-fat and low-fat dairy food intake (servings/1000kcal) with incident diabetes among participants in the Strong Heart Family Study (stratified by BMI)<sup>1</sup>**

|                                                                    | Tertile 1 | Tertile 2                      | Tertile 3         | <i>P</i> -trend |
|--------------------------------------------------------------------|-----------|--------------------------------|-------------------|-----------------|
| <b>Full-fat dairy food intake (servings/1000 kcal)<sup>2</sup></b> |           |                                |                   |                 |
| <b>BMI (&lt;30 kg/m<sup>2</sup>)</b>                               |           |                                |                   |                 |
| No. of cases                                                       | 24        | 22                             | 23                |                 |
| Total no. at risk                                                  | 269       | 272                            | 298               |                 |
| Minimally adjusted <sup>3</sup>                                    | 1.0       | 0.94 (0.50, 1.79) <sup>4</sup> | 0.90 (0.47, 1.69) | 0.74            |
| Multivariate <sup>5</sup>                                          | 1.0       | 0.96 (0.50, 1.82)              | 0.90 (0.48, 1.71) | 0.75            |
| BMI <sup>6</sup>                                                   | 1.0       | 0.96 (0.50, 1.82)              | 0.90 (0.48, 1.71) | 0.75            |
| <b>BMI (≥30 kg/m<sup>2</sup>)</b>                                  |           |                                |                   |                 |
| No. of cases                                                       | 79        | 71                             | 58                |                 |
| Total no. at risk                                                  | 272       | 269                            | 243               |                 |
| Minimally adjusted <sup>3</sup>                                    | 1.0       | 0.86 (0.58, 1.27)              | 0.79 (0.58, 1.07) | 0.13            |
| Multivariate <sup>5</sup>                                          | 1.0       | 0.86 (0.57, 1.29)              | 0.79 (0.58, 1.07) | 0.14            |
| BMI <sup>6</sup>                                                   | 1.0       | 0.86 (0.57, 1.29)              | 0.79 (0.58, 1.07) | 0.14            |
| <b>Low-fat dairy food intake (servings/1000 kcal)<sup>7</sup></b>  |           |                                |                   |                 |
| <b>BMI (&lt;30 kg/m<sup>2</sup>)</b>                               |           |                                |                   |                 |
| No. of cases                                                       | 33        | 12                             | 24                |                 |
| Total no. at risk                                                  | 363       | 197                            | 279               |                 |
| Minimally adjusted <sup>3</sup>                                    | 1.0       | 0.67 (0.36, 1.22)              | 1.02 (0.62, 1.66) | 0.96            |
| Multivariate <sup>5</sup>                                          | 1.0       | 0.65 (0.35, 1.22)              | 0.96 (0.58, 1.57) | 0.77            |
| BMI <sup>6</sup>                                                   | 1.0       | 0.65 (0.35, 1.22)              | 0.96 (0.58, 1.57) | 0.77            |
| <b>BMI (≥30 kg/m<sup>2</sup>)</b>                                  |           |                                |                   |                 |
| No. of cases                                                       | 72        | 66                             | 70                |                 |
| Total no. at risk                                                  | 283       | 239                            | 262               |                 |
| Minimally adjusted <sup>3</sup>                                    | 1.0       | 1.07 (0.77, 1.48)              | 1.04 (0.77, 1.41) | 0.80            |
| Multivariate <sup>8</sup>                                          | 1.0       | 1.08 (0.77, 1.51)              | 1.06 (0.78, 1.42) | 0.72            |

## Supplementary Data

|                  |     |                   |                   |      |
|------------------|-----|-------------------|-------------------|------|
| BMI <sup>6</sup> | 1.0 | 1.08 (0.77, 1.51) | 1.06 (0.78, 1.42) | 0.72 |
|------------------|-----|-------------------|-------------------|------|

---

<sup>1</sup> BMI, body mass index; CI, confidence interval; IQR, inter-quartile range; kcal, kilocalorie

<sup>2</sup> Full-fat dairy food group consisted of whole milk, and cheese and cheese spreads with one serving equal to 250 mL (8 ounces) of milk or 42.5 g (1.5 ounces) of cheese or cheese spread

<sup>3</sup> Adjusted for age, sex, site, and total caloric intake

<sup>4</sup> Hazard ratios (95% CI) (all such values)

<sup>5</sup> Additionally adjusted for education, physical activity, smoking status, diet quality (alternative healthy eating index), low-fat dairy food intake

<sup>6</sup> Additionally adjusted for body mass index

<sup>7</sup> Low-fat dairy food group consisted of 2% milk, 1% milk, non-fat milk, and low-fat cheese and cheese spreads with one serving equal to 250 mL (8 ounces) of milk or 42.5 g (1.5 ounces) of cheese or cheese spread

<sup>8</sup> Additionally adjusted for education, physical activity, smoking status, diet quality (alternative healthy eating index), full-fat dairy food intake

**Supplemental Table 2. Hazard Ratios (95% CIs) for associations of full-fat and low-fat dairy food intake (servings/1000kcal) with incident diabetes among participants in the Strong Heart Family Study (stratified by sex)<sup>1</sup>**

|                                                                    | Tertile 1 | Tertile 2                      | Tertile 3         | <i>P</i> -trend |
|--------------------------------------------------------------------|-----------|--------------------------------|-------------------|-----------------|
| <b>Full-fat dairy food intake (servings/1000 kcal)<sup>2</sup></b> |           |                                |                   |                 |
| <b>Females</b>                                                     |           |                                |                   |                 |
| No. of cases                                                       | 71        | 55                             | 49                |                 |
| Total no. at risk                                                  | 344       | 331                            | 311               |                 |
| Minimally adjusted <sup>3</sup>                                    | 1.0       | 0.78 (0.53, 1.13) <sup>4</sup> | 0.78 (0.53, 1.16) | 0.21            |
| Multivariate <sup>5</sup>                                          | 1.0       | 0.77 (0.53, 1.14)              | 0.79 (0.53, 1.17) | 0.22            |
| BMI <sup>6</sup>                                                   | 1.0       | 0.77 (0.52, 1.13)              | 0.79 (0.52, 1.21) | 0.26            |
| <b>Males</b>                                                       |           |                                |                   |                 |
| No. of cases                                                       | 32        | 38                             | 32                |                 |
| Total no. at risk                                                  | 197       | 210                            | 230               |                 |
| Minimally adjusted <sup>3</sup>                                    | 1.0       | 1.09 (0.67, 1.78)              | 0.80 (0.53, 1.21) | 0.27            |
| Multivariate <sup>5</sup>                                          | 1.0       | 1.09 (0.67, 1.77)              | 0.80 (0.53, 1.21) | 0.26            |
| BMI <sup>6</sup>                                                   | 1.0       | 1.20 (0.71, 2.02)              | 0.98 (0.62, 1.56) | 0.94            |
| <b>Low-fat dairy food intake (servings/1000 kcal)<sup>7</sup></b>  |           |                                |                   |                 |
| <b>Females</b>                                                     |           |                                |                   |                 |
| No. of cases                                                       | 67        | 53                             | 55                |                 |
| Total no. at risk                                                  | 373       | 286                            | 327               |                 |
| Minimally adjusted <sup>3</sup>                                    | 1.0       | 0.99 (0.69, 1.41)              | 0.91 (0.66, 1.26) | 0.58            |
| Multivariate <sup>5</sup>                                          | 1.0       | 0.95 (0.65, 1.38)              | 0.93 (0.67, 1.29) | 0.64            |
| BMI <sup>6</sup>                                                   | 1.0       | 0.79 (0.55, 1.14)              | 0.80 (0.57, 1.11) | 0.18            |
| <b>Males</b>                                                       |           |                                |                   |                 |
| No. of cases                                                       | 38        | 25                             | 39                |                 |
| Total no. at risk                                                  | 273       | 150                            | 214               |                 |
| Minimally adjusted <sup>3</sup>                                    | 1.0       | 1.27 (0.72, 2.25)              | 1.45 (0.87, 2.44) | 0.15            |
| Multivariate <sup>8</sup>                                          | 1.0       | 1.29 (0.70, 2.37)              | 1.47 (0.87, 2.48) | 0.15            |

## Supplementary Data

|                  |     |                   |                   |      |
|------------------|-----|-------------------|-------------------|------|
| BMI <sup>6</sup> | 1.0 | 1.22 (0.71, 2.08) | 1.27 (0.75, 2.17) | 0.37 |
|------------------|-----|-------------------|-------------------|------|

---

<sup>1</sup> BMI, body mass index; CI, confidence interval; IQR, inter-quartile range; kcal, kilocalorie

<sup>2</sup> Full-fat dairy food group consisted of whole milk, and cheese and cheese spreads with one serving equal to 250 mL (8 ounces) of milk or 42.5 g (1.5 ounces) of cheese or cheese spread

<sup>3</sup> Adjusted for age, site, and total caloric intake

<sup>4</sup> Hazard ratios (95% CI) (all such values)

<sup>5</sup> Additionally adjusted for education, physical activity, smoking status, diet quality (alternative healthy eating index), low-fat dairy food intake

<sup>6</sup> Additionally adjusted for body mass index

<sup>7</sup> Low-fat dairy food group consisted of 2% milk, 1% milk, non-fat milk, and low-fat cheese and cheese spreads with one serving equal to 250 mL (8 ounces) of milk or 42.5 g (1.5 ounces) of cheese or cheese spread

<sup>8</sup> Additionally adjusted for education, physical activity, smoking status, diet quality (alternative healthy eating index), full-fat dairy food intake

**Supplemental Table 3. Hazard Ratios (95% CIs) for associations of full-fat and low-fat dairy food intake (servings/1000kcal) with incident diabetes among participants in the Strong Heart Family Study (stratified by median age)<sup>1</sup>**

|                                                                    | Tertile 1 | Tertile 2                      | Tertile 3         | <i>P</i> -trend |
|--------------------------------------------------------------------|-----------|--------------------------------|-------------------|-----------------|
| <b>Full-fat dairy food intake (servings/1000 kcal)<sup>2</sup></b> |           |                                |                   |                 |
| <b>&lt;36 years old</b>                                            |           |                                |                   |                 |
| No. of cases                                                       | 42        | 41                             | 34                |                 |
| Total no. at risk                                                  | 241       | 286                            | 291               |                 |
| Minimally adjusted <sup>3</sup>                                    | 1.0       | 0.80 (0.52, 1.25) <sup>4</sup> | 0.72 (0.48, 1.09) | 0.12            |
| Multivariate <sup>5</sup>                                          | 1.0       | 0.76 (0.48, 1.22)              | 0.70 (0.47, 1.05) | 0.09            |
| BMI <sup>6</sup>                                                   | 1.0       | 0.72 (0.46, 1.11)              | 0.71 (0.47, 1.08) | 0.11            |
| <b>≥ 36 years old</b>                                              |           |                                |                   |                 |
| No. of cases                                                       | 61        | 52                             | 47                |                 |
| Total no. at risk                                                  | 300       | 255                            | 250               |                 |
| Minimally adjusted <sup>3</sup>                                    | 1.0       | 0.91 (0.60, 1.39)              | 0.85 (0.60, 1.22) | 0.38            |
| Multivariate <sup>5</sup>                                          | 1.0       | 0.91 (0.60, 1.38)              | 0.85 (0.59, 1.20) | 0.35            |
| BMI <sup>6</sup>                                                   | 1.0       | 1.00 (0.65, 1.54)              | 0.89 (0.62, 1.30) | 0.57            |
| <b>Low-fat dairy food intake (servings/1000 kcal)<sup>7</sup></b>  |           |                                |                   |                 |
| <b>&lt;36 years old</b>                                            |           |                                |                   |                 |
| No. of cases                                                       | 42        | 39                             | 36                |                 |
| Total no. at risk                                                  | 328       | 215                            | 275               |                 |
| Minimally adjusted <sup>3</sup>                                    | 1.0       | 1.10 (0.69, 1.74)              | 0.82 (0.54, 1.23) | 0.33            |
| Multivariate <sup>5</sup>                                          | 1.0       | 1.08 (0.68, 1.73)              | 0.87 (0.56, 1.36) | 0.54            |
| BMI <sup>6</sup>                                                   | 1.0       | 0.92 (0.54, 1.57)              | 0.82 (0.51, 1.33) | 0.42            |
| <b>≥ 36 years old</b>                                              |           |                                |                   |                 |
| No. of cases                                                       | 63        | 39                             | 58                |                 |
| Total no. at risk                                                  | 318       | 221                            | 266               |                 |
| Minimally adjusted <sup>3</sup>                                    | 1.0       | 0.96 (0.68, 1.37)              | 1.26 (0.83, 1.90) | 0.30            |
| Multivariate <sup>8</sup>                                          | 1.0       | 0.97 (0.67, 1.41)              | 1.26 (0.82, 1.93) | 0.30            |

## Supplementary Data

|                  |     |                   |                   |      |
|------------------|-----|-------------------|-------------------|------|
| BMI <sup>6</sup> | 1.0 | 0.85 (0.58, 1.23) | 1.06 (0.68, 1.66) | 0.79 |
|------------------|-----|-------------------|-------------------|------|

---

<sup>1</sup> BMI, body mass index; CI, confidence interval; IQR, inter-quartile range; kcal, kilocalorie

<sup>2</sup> Full-fat dairy food group consisted of whole milk, and cheese and cheese spreads with one serving equal to 250 mL (8 ounces) of milk or 42.5 g (1.5 ounces) of cheese or cheese spread

<sup>3</sup> Adjusted for age, sex, site, and total caloric intake

<sup>4</sup> Hazard ratios (95% CI) (all such values)

<sup>5</sup> Additionally adjusted for education, physical activity, smoking status, diet quality (alternative healthy eating index), low-fat dairy food intake

<sup>6</sup> Additionally adjusted for body mass index

<sup>7</sup> Low-fat dairy food group consisted of 2% milk, 1% milk, non-fat milk, and low-fat cheese and cheese spreads with one serving equal to 250 mL (8 ounces) of milk or 42.5 g (1.5 ounces) of cheese or cheese spread

<sup>8</sup> Additionally adjusted for education, physical activity, smoking status, diet quality (alternative healthy eating index), full-fat dairy food intake

**Supplemental Table 4. Hazard Ratios (95% CIs) for associations of reported intake of full-fat milk, low- and non-fat milk, and full-fat cheese and cheese spreads with incident diabetes among participants in the Strong Heart Family Study<sup>1</sup>**

|                                                                                   | Quantile 1 <sup>2</sup> | Quantile 2 <sup>2</sup>        | Quantile 3 <sup>2</sup> | <i>P</i> -trend |
|-----------------------------------------------------------------------------------|-------------------------|--------------------------------|-------------------------|-----------------|
| <b>Full-Fat Milk<br/>(servings/1000kcal)<sup>3</sup></b>                          | 0                       | 0.01-2.19                      | _____                   |                 |
| Median intake (IQR)                                                               | 0 (0, 0)                | 0.15 (0.05, 0.37)              | _____                   |                 |
| No. of cases                                                                      | 195                     | 82                             | _____                   |                 |
| Total no. at risk                                                                 | 1093                    | 530                            | _____                   |                 |
| Minimally adjusted <sup>4</sup>                                                   | 1.0                     | 0.90 (0.66, 1.23) <sup>5</sup> | _____                   | 0.50            |
| Multivariate <sup>6</sup>                                                         | 1.0                     | 0.91 (0.67, 1.23)              | _____                   | 0.53            |
| BMI <sup>7</sup>                                                                  | 1.0                     | 1.03 (0.76, 1.40)              | _____                   | 0.84            |
| <b>Low- and Non-fat Milk<br/>(servings/1000kcal)<sup>3</sup></b>                  | 0                       | 0.01-0.11                      | 0.12-4.55               |                 |
| Median intake (IQR)                                                               | 0 (0,0)                 | 0.04 (0.02, 0.07)              | 0.39 (0.22, 0.69)       |                 |
| No. of cases                                                                      | 110                     | 73                             | 94                      |                 |
| Total no. at risk                                                                 | 672                     | 410                            | 541                     |                 |
| Minimally adjusted <sup>4</sup>                                                   | 1.0                     | 1.00 (0.74, 1.36)              | 1.02 (0.75, 1.37)       | 0.71            |
| Multivariate <sup>8</sup>                                                         | 1.0                     | 0.99 (0.73, 1.36)              | 1.05 (0.77, 1.42)       | 0.54            |
| BMI <sup>7</sup>                                                                  | 1.0                     | 0.88 (0.64, 1.21)              | 0.88 (0.64, 1.22)       | 0.80            |
| <b>Full-Fat Cheese and Cheese<br/>Spreads<br/>(servings/1000kcal)<sup>3</sup></b> | 0-0.03                  | >0.03-0.11                     | >0.11-1.17              |                 |
| Median intake (IQR)                                                               | 0.01 (0, 0.02)          | 0.07 (0.05, 0.08)              | 0.19 (0.14, 0.28)       |                 |
| No. of cases                                                                      | 107                     | 87                             | 83                      |                 |
| Total no. at risk                                                                 | 541                     | 541                            | 541                     |                 |
| Minimally adjusted <sup>4</sup>                                                   | 1.0                     | 0.83 (0.61, 1.11)              | 0.82 (0.59, 1.14)       | 0.37            |
| Multivariate <sup>9</sup>                                                         | 1.0                     | 0.83 (0.61, 1.11)              | 0.82 (0.59, 1.14)       | 0.37            |
| BMI <sup>7</sup>                                                                  | 1.0                     | 0.75 (0.57, 0.99)              | 0.78 (0.56, 1.0)        | 0.25            |

<sup>1</sup> BMI, body mass index; CI, confidence interval; IQR, inter-quartile range; kcal, kilocalorie<sup>2</sup> Low-fat and non-fat milk categorized as tertiles. Due to few consumers of full-fat milk, full-fat milk was categorized dichotomously<sup>3</sup> One serving equal to 250 mL (8 ounces) of milk or 42.5 g (1.5 ounces) of cheese or cheese spread<sup>4</sup> Adjusted for age, sex, site, and total caloric intake



## Supplementary Data

<sup>5</sup> Hazard ratios (95% CI) (all such values)

<sup>6</sup> Additionally adjusted for education, physical activity, smoking status, diet quality (alternative healthy eating index), and intake of low- and non-fat milk and full-fat cheese and cheese spreads

<sup>7</sup> Additionally adjusted for body mass index

<sup>8</sup> Additionally adjusted for education, physical activity, smoking status, diet quality (alternative healthy eating index), and intake of full-fat milk and cheese and cheese spreads

<sup>9</sup> Additionally adjusted for education, physical activity, smoking status, diet quality (alternative healthy eating index), and intake of full-fat milk and low- and non-fat milk

**Supplemental Table 5. Hazard Ratios (95% CIs) for associations of full-fat or low-fat dairy food intake with incident diabetes among participants in the Strong Heart Family Study (follow-up truncated post-2007-2009 examination)<sup>1</sup>**

|                                                                    | Tertile 1        | Tertile 2                      | Tertile 3         | <i>P</i> -trend |
|--------------------------------------------------------------------|------------------|--------------------------------|-------------------|-----------------|
| <b>Full-fat dairy food intake (servings/1000 kcal)<sup>2</sup></b> | <0.05            | 0.05 to <0.18                  | ≥0.18             |                 |
| Median intake (IQR)                                                | 0.02 (0.00,0.03) | 0.11 (0.08,0.14)               | 0.34 (0.25,0.51)  |                 |
| No. of cases                                                       | 65               | 54                             | 53                |                 |
| Total no. at risk                                                  | 541              | 541                            | 541               |                 |
| Minimally adjusted <sup>3</sup>                                    | 1.0              | 0.83 (0.54, 1.29) <sup>4</sup> | 0.82 (0.57, 1.19) | 0.30            |
| Multivariate <sup>5</sup>                                          | 1.0              | 0.85 (0.55, 1.30)              | 0.86 (0.59, 1.25) | 0.41            |
| BMI <sup>6</sup>                                                   | 1.0              | 0.87 (0.56, 1.36)              | 0.92 (0.60, 1.42) | 0.71            |
| <b>Low-fat dairy food intake (servings/1000 kcal)<sup>7</sup></b>  | 0                | 0 to <0.13                     | ≥0.13             |                 |
| Median intake (IQR)                                                | 0 (0,0)          | 0.04 (0.02,0.08)               | 0.40 (0.24,0.70)  |                 |
| No. of cases                                                       | 61               | 48                             | 63                |                 |
| Total no. at risk                                                  | 646              | 436                            | 541               |                 |
| Minimally adjusted <sup>3</sup>                                    | 1.0              | 1.18 (0.80, 1.73)              | 1.32 (0.93, 1.89) | 0.12            |
| Multivariate <sup>8</sup>                                          | 1.0              | 1.15 (0.75, 1.77)              | 1.32 (0.89, 1.96) | 0.16            |
| BMI <sup>6</sup>                                                   | 1.0              | 0.94 (0.62, 1.44)              | 1.11 (0.73, 1.69) | 0.59            |

<sup>1</sup> BMI, body mass index; CI, confidence interval; IQR, inter-quartile range; kcal, kilocalorie

<sup>2</sup> Full-fat dairy food group consisted of whole milk, and cheese and cheese spreads with one serving equal to 250 mL (8 ounces) of milk or 42.5 g (1.5 ounces) of cheese or cheese spread

<sup>3</sup> Adjusted for age, sex, site, and total caloric intake

<sup>4</sup> Hazard ratios (95% CI) (all such values)

<sup>5</sup> Additionally adjusted for education, physical activity, smoking status, diet quality (alternative healthy eating index), low-fat dairy food intake

<sup>6</sup> Additionally adjusted for body mass index

<sup>7</sup> Low-fat dairy food group consisted of 2% milk, 1% milk, non-fat milk, and low-fat cheese and cheese spreads with one serving equal to 250 mL (8 ounces) of milk or 42.5 g (1.5 ounces) of cheese or cheese spread

<sup>8</sup> Additionally adjusted for education, physical activity, smoking status, diet quality (alternative healthy eating index), full-fat dairy food intake

**Supplemental Table 6. Hazard Ratios (95% CIs) for associations of full-fat dairy food intake (including cream, ice cream, and butter in the classification of full-fat dairy foods) with incident diabetes among participants in the Strong Heart Family Study<sup>1</sup>**

|                                                                    | Tertile 1         | Tertile 2                      | Tertile 3         | <i>P</i> -trend |
|--------------------------------------------------------------------|-------------------|--------------------------------|-------------------|-----------------|
| <b>Full-fat dairy food intake (servings/1000 kcal)<sup>2</sup></b> | <0.17             | 0.17-<0.40                     | ≥0.40             |                 |
| Median intake (IQR)                                                | 0.09 (0.05, 0.12) | 0.27 (0.21, 0.32)              | 0.62 (0.50, 0.94) |                 |
| No. of cases                                                       | 103               | 93                             | 81                |                 |
| Total no. at risk                                                  | 541               | 541                            | 541               |                 |
| Minimally adjusted <sup>3</sup>                                    | 1.0               | 0.89 (0.63, 1.25) <sup>4</sup> | 0.80 (0.53, 1.20) | 0.07            |
| Multivariate <sup>5</sup>                                          | 1.0               | 0.88 (0.63, 1.24)              | 0.79 (0.53, 1.17) | 0.03            |
| BMI <sup>6</sup>                                                   | 1.0               | 0.90 (0.64, 1.27)              | 0.81 (0.53, 1.25) | 0.08            |

<sup>1</sup> BMI, body mass index; CI, confidence interval; IQR, inter-quartile range; kcal, kilocalorie

<sup>2</sup> Full-fat dairy food group consisted of whole milk, cheese and cheese spreads, cream, ice cream, and butter with one serving equal to 250 mL (8 ounces) of milk, 42.5 g (1.5 ounces) of cheese or cheese spread, 15 grams (1 tablespoon) cream or butter, and 107 grams (4 ounces) ice cream

<sup>3</sup> Adjusted for age, sex, site, and total caloric intake

<sup>4</sup> Hazard ratios (95% CI) (all such values)

<sup>5</sup> Additionally adjusted for education, physical activity, smoking status, diet quality (alternative healthy eating index), low-fat dairy food intake

<sup>6</sup> Additionally adjusted for body mass index
